# Supplementary material for: The Inflammatory Transcription Factors NFκB, STAT1 and STAT3 Drive Age-Associated Transcriptional Changes in the Human Kidney
Source: PLoS Genet. 2015 Dec 17;11(12):e1005734. doi: 10.1371/journal.pgen.1005734 (PMC4682820; doi:10.1371/journal.pgen.1005734)
Supplement: S1 Table — (XLS) [file pgen.1005734.s010.xls]

## Sheet: Aging TF overlap Summary Data
Transcription factor
	Cell line (condition)	# targetsa	# targets age-regulatedb	Enrichmentc	P-valued
STAT1	K562 cells	142	23	3.64	2.05e-09
	IFN-γ-stimulated
STAT1e	K562 cells	71	14	4.43	1.31e-05
	IFNa-stimulated
STAT1	K562 cells	162	19	2.64	6.5e-05
	IFN-γ-stimulated
STAT1	K562 cells	107	13	2.72	0.0008
	IFNa-stimulated
STAT1	HeLa S3 cells	831	54	2.64	0.0068
	IFN-γ-stimulated
STAT1	Lymphoblastoid cell line	4851	250	1.16	0.0068
NFκB	Lymphoblastoid cell line	1092	110	2.26	4.84e-18
(RelA)	TNFa-stimulated
NFκB	Lymphoblastoid cell line	1423	130	2.05	5.48e-17
(RelA)	TNFa-stimulated
NFκBe	Lymphoblastoid cell line	308	47	3.42	7.57e-17
(RelA)	TNFa-stimulated
NFκB	Lymphoblastoid cell line	2610	194	1.67	2.41e-14
(RelA)	TNFa-stimulated
NFκB	Lymphoblastoid cell line	1099	193	2.1	2.59e-14
(RelA)	TNFa-stimulated
NFκB	Lymphoblastoid cell line	866	87	2.26	3.17e-14
(RelA)	TNFa-stimulated
NFκB	Lymphoblastoid cell line	2018	159	1.77	5.96e-14
(RelA)	TNFa-stimulated
NFκB	Lymphoblastoid cell line	448	55	2.75	1.18e-13
(RelA)	TNFa-stimulated
NFκB	Lymphoblastoid cell line	1949	151	1.74	1.48e-12
(RelA)	TNFa-stimulated
NFκB	Lymphoblastoid cell line	884	83	2.11	1.16e-11
(RelA)	TNFa-stimulated
STAT3e	Lymphoblastoid cell line	936	56	2.09	2.97e-10
STAT3	MCF-10 cells	4308	230	1.2	0.0017
	EtOH-treated
STAT3	MCF-10 cells	4673	243	1.17	0.005
	Tamoxifen-treated
STAT3	HeLa S3 cells	936	56	1.34	0.032
STAT3	MCF-10 cells	6063	296	1.1	0.049
	Tamoxifen-treated
STAT3	MCF-10 cells	5251	259	1.11	0.05
	EtOH-treated
STAT3	MCF-10 cells	4436	213	1.08	0.21
	EtOH-treated

## Sheet: Age-regulated STAT1 targets
List of age-regulated STAT1 ChIP-seq targets
HLA-E
PARP14
RBCK1
NUB1
DTX3L
DDX58
LY6E
SAMD9
IFITM1
TRIM22
SAMHD1
STOML1
SAMD9L
TAP1

## Sheet: Age-regulated STAT3 targets
List of age-regulated STAT3 ChIP-seq targets
AATF
AKNA
AMICA1
ARHGAP25
C18orf1
C1orf38
C7orf23
CD69
CD97
CHI3L2
CHST15
CLEC7A
CLIC1
CMTM3
CXCR4
DOCK2
DOK1
DPP3
FAS
GNG2
GPNMB
HLA-B
HLA-DPA1
HLA-DQB1
HLA-DRA
HLA-E
IL4I1
ITGB2
LAPTM5
LPCAT1
LYN
MPEG1
MS4A7
NAPSB
NFKBIZ
NKG7
NUB1
PARP12
PIGR
PSMB8
PSMB9
PTPN6
RAB3GAP1
RASSF5
RFTN1
RGS1
RGS10
RIN3
SELPLG
SLC46A3
SPTLC3
TAGLN2
TRIM22
VIM
VOPP1
ZCCHC7

## Sheet: Age-regulated NFkB targets
List of age-regulated NFkB ChIP-seq targets
HLA-F
AMPD3
PARP14
ALPK2
COL1A1
TBC1D2B
LST1
LTB
PRAGMIN
ASAP1
HLA-DRA
ITM2C
SPTLC3
HLA-DQB1
RBMS3
C1orf38
RFTN1
LY6E
HLA-DPA1
AUTS2
IL4I1
C7orf23
HLA-DQA1
FLT3LG
IGHM
FNBP1
SYNGR2
IL32
CD69
CORO1A
CXCR4
PTPN6
C1orf186
HLA-B
ITGB2
ARPC1B
CHI3L2
RUNX3
AKNA
HLA-A
SRGN
GNAS
CCND2
CD97
PFN1
FAS
