# Supplementary material for: The Inflammatory Transcription Factors NFκB, STAT1 and STAT3 Drive Age-Associated Transcriptional Changes in the Human Kidney
Source: PLoS Genet. 2015 Dec 17;11(12):e1005734. doi: 10.1371/journal.pgen.1005734 (PMC4682820; doi:10.1371/journal.pgen.1005734)
Supplement: S4 Table — (XLS) [file pgen.1005734.s013.xls]

## Sheet: rat & human TFs
Transcription factor	P-valueb	Enrichmentc
(Cell line)a
NFκB (RelA)	3.8e-09	2.93
(TNF-stimulated
lymphoblastoid cell line)
STAT3	0.00034	2.24
(lymphoblastoid cell line)
MEF2A	0.0008	1.7
(lymphoblastoid cell line)
ETS1	0.0012	1.78
(A549 alveolar epithelial cells)
STAT1	0.0014	4.38
(IFNγ-stimulated K562 cells)
